# Supplementary material for: Thorough Characterization of ETHQB3.5, a QTL Involved in Melon Fruit Climacteric Behavior and Aroma Volatile Composition
Source: MDPI journal article supplement (doi:10.3390/foods12020376), 2023-01-13
Supplement: s1 [file s1]

## **Supplementary Figure S1**

**Thorough characterization of *ETHQB3.5*, a QTL involved in climacteric behavior and aroma volatile composition located on chromosome 3 of melon genome**

Noelia Dos-Santos, María C. Bueso, Aurora Díaz, Eduard Moreno,  
Jordi Garcia-Mas, Antonio J. Monforte, J. Pablo Fernández-Trujillo

Foods-MDPI

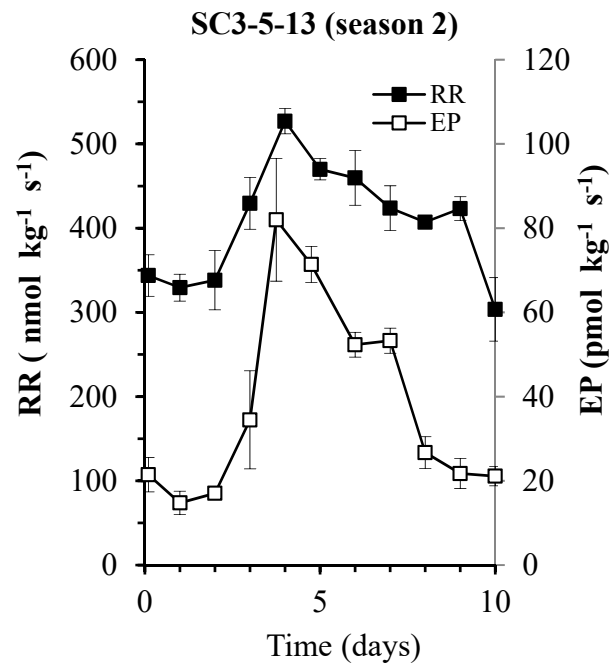

Supplementary Figure S1. Respiration rate (RR) and ethylene production (EP) in Near-Isogenic Line SC3-5-13 (mean  $\pm$  SE,  $n=3$ ) during postharvest ripening at 21 °C and relative humidity of  $66\pm6\%$  during 10 days (season 2).
